# Supplementary material for: Fuc-S—A New Ultrasonic Degraded Sulfated α-l-Fucooligosaccharide—Alleviates DSS-Inflicted Colitis through Reshaping Gut Microbiota and Modulating Host–Microbe Tryptophan Metabolism
Source: MDPI journal article supplement (doi:10.3390/md21010016), 2022-12-25
Supplement: s1 [file s1]

## **Structural characterization and anti-colic effects of a new degraded polysaccharide from fucoidan**

Haitao Xiao<sup>a,1\*</sup>, Jinxiu Feng<sup>b,1</sup>, Jiao Peng<sup>c</sup>, Peigen Wu<sup>a,d</sup>, Yaoyao Chang<sup>a</sup>, Xianqian Li<sup>a</sup>, Jinhui Wu<sup>b</sup>, Haifeng Huang<sup>a</sup>, Huan Deng<sup>a</sup>, Miao Qiu<sup>a</sup>, Yuedong Yang<sup>b\*</sup>, Bin Du<sup>b\*</sup>

<sup>a</sup>School of Pharmaceutical Sciences, Health Science Center, Shenzhen University, Shenzhen, China.

<sup>b</sup>Hebei Key Laboratory of Natural Products Activity Components and Function, Hebei Normal University of Science and Technology, Qinhuangdao, China.

<sup>c</sup>Department of Pharmacy, Peking University Shenzhen Hospital, Shenzhen, China.

<sup>d</sup>School of Pharmaceutical Sciences, Guizhou Medical University, Guizhou, China.

<sup>1</sup>These authors contributed equally to this work.

\*Correspondence: Bin Du, Professor, Hebei Key Laboratory of Natural Products Activity Components and Function, Hebei Normal University of Science and Technology, Qinhuangdao, China. Tel: +86-335-8387040, fax: +86-335-8387040, E-mail: bindufood@aliyun.com; or Yuedong Yang, Professor, Hebei Key Laboratory of Natural Products Activity Components and Function, Hebei Normal University of Science and Technology, Qinhuangdao, China. Tel: +86 335 8387040, fax: +86 335 8387040, E-mail: kycyyd@126.com; Hai-tao Xiao, Ph.D. School of Pharmaceutical Sciences, Health Science Center, Shenzhen University, 518060, Shenzhen, China. Email: xhaitao@szu.edu.cn.

## 1. Supplementary Figures

### 1.1 Fig S1

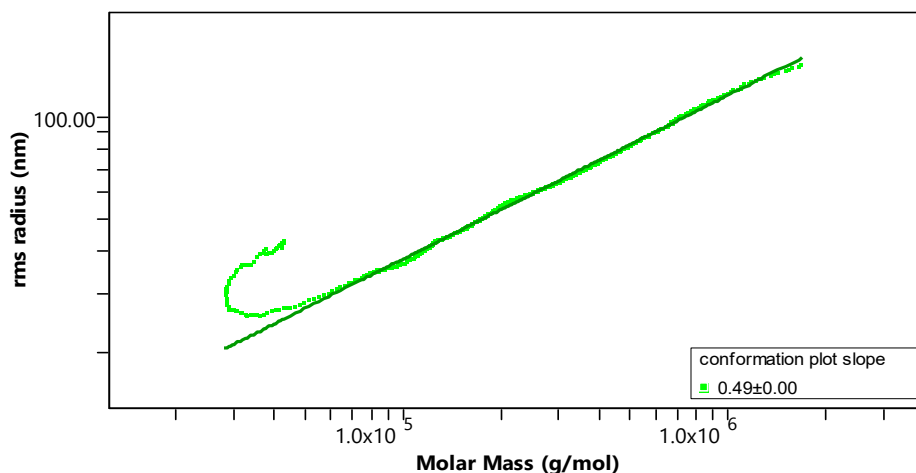

**Supplementary Fig S1.** The dependence of radius of gyration on molar mass.

Fig S1. showed the relationship between molecular weights and radius of gyration. Based on the theory of polymer solution, the slope of  $R_g$ -Mw value 0.33, 0.5-0.6 and 1 showed chain shapes of sphere, random coil, and rigid rod, respectively (Meng et al., 2018; Nie et al., 2020). As calculated from Fig. S1., the slope of  $R_g$ -Mw was 0.49, which indicated that fucoidan existed as a random coil in aqueous solution. The radius of gyration has applications in structural, mechanical and molecular engineering. It is defined as the distance between an axis and the point of maximum inertia in a rotating system.

## 1.2 Fig S2

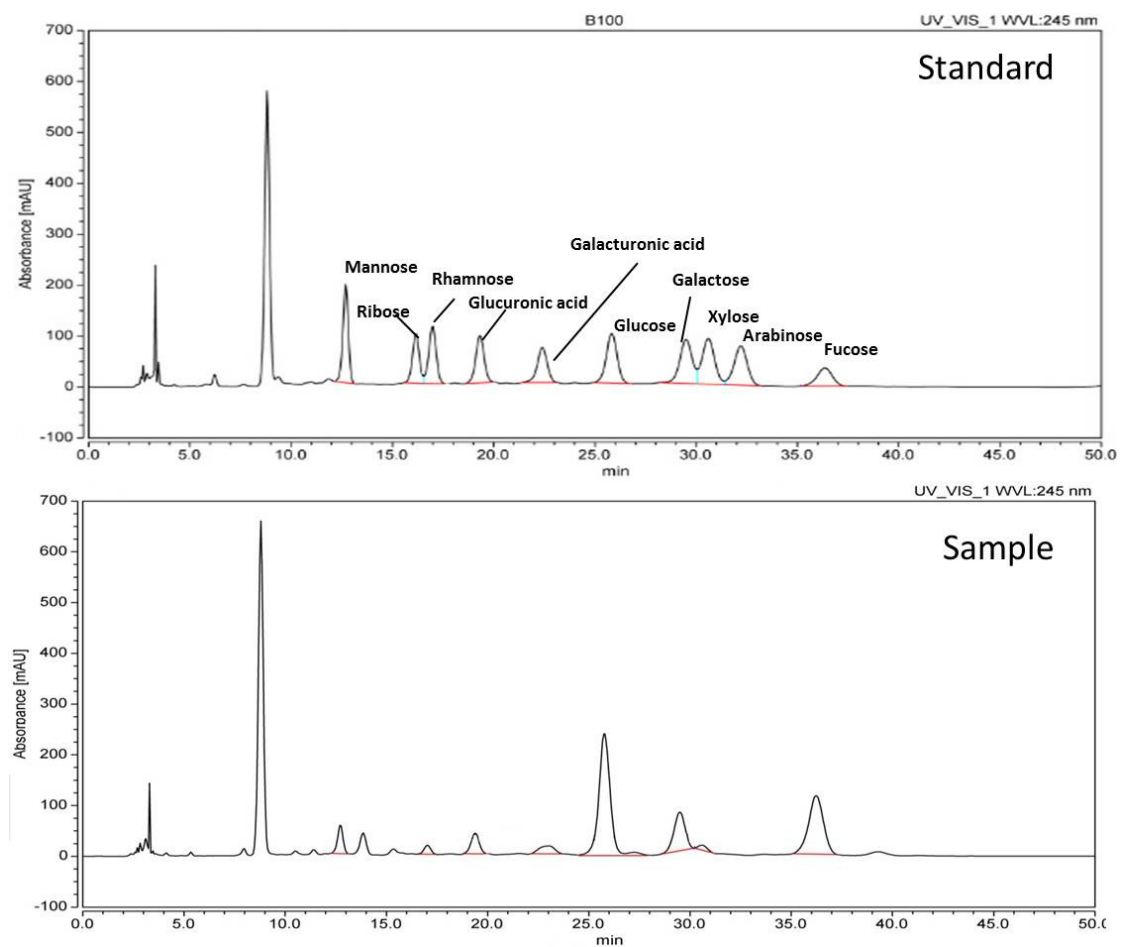

**Fig S2** Monosaccharide composition determination of **Fuc-S**.

1.3 Fig S3

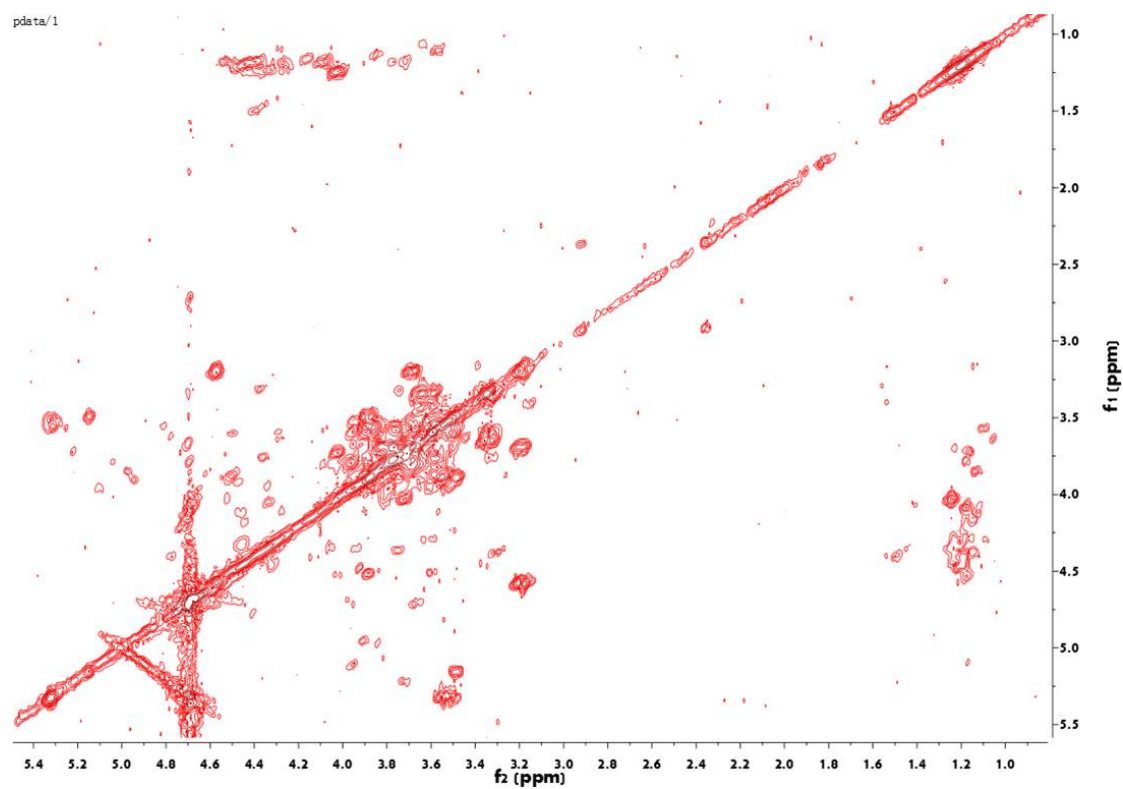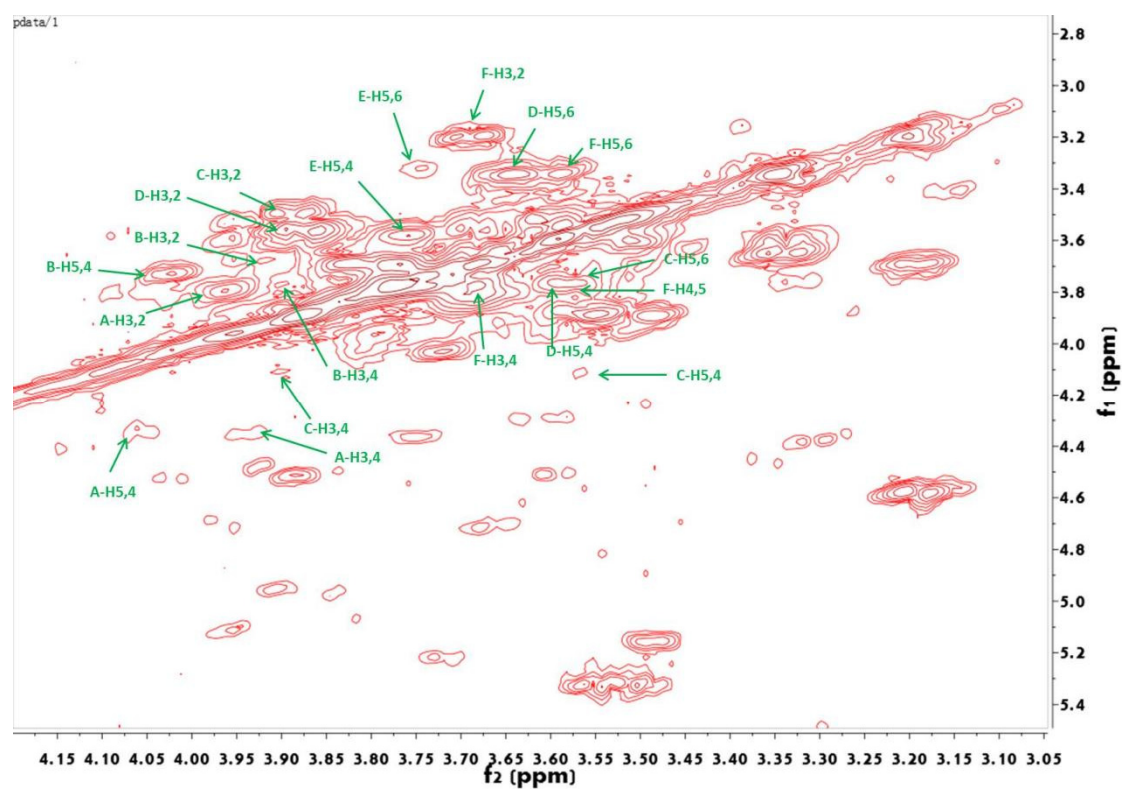

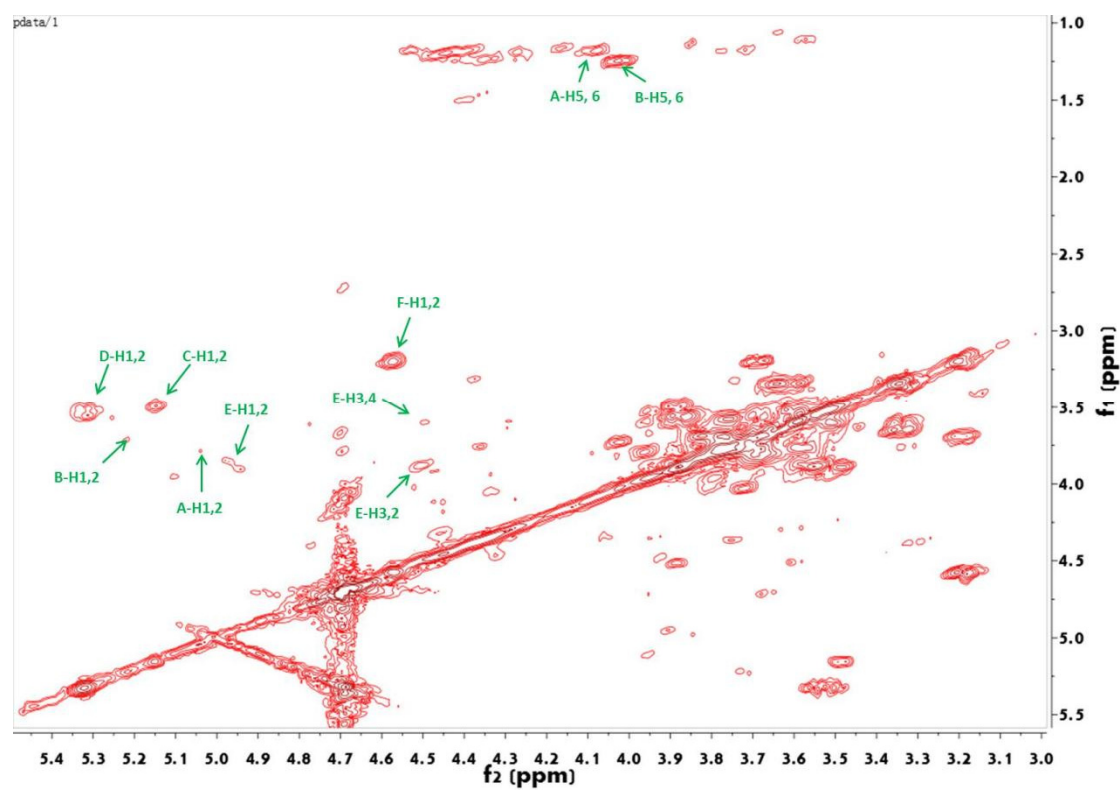

**Fig S3** Enlarged  $^1\text{H}$ - $^1\text{H}$  COSY of Fuc-S

# 1.4 Fig S4

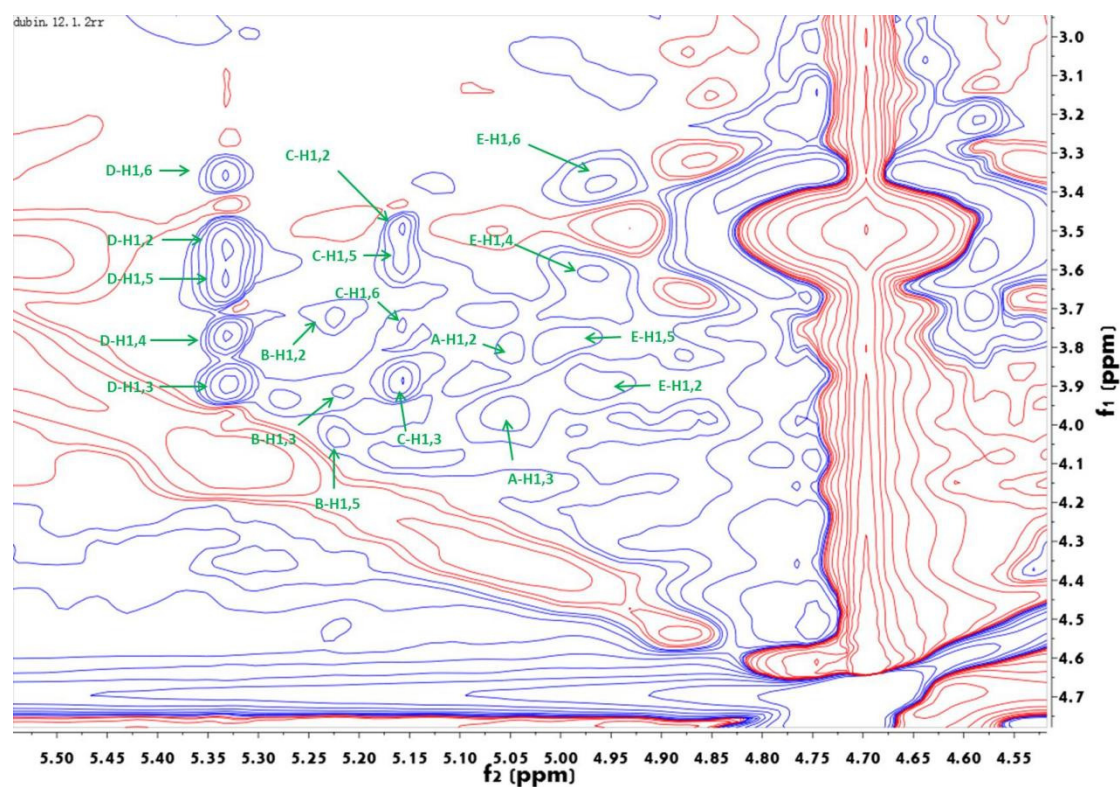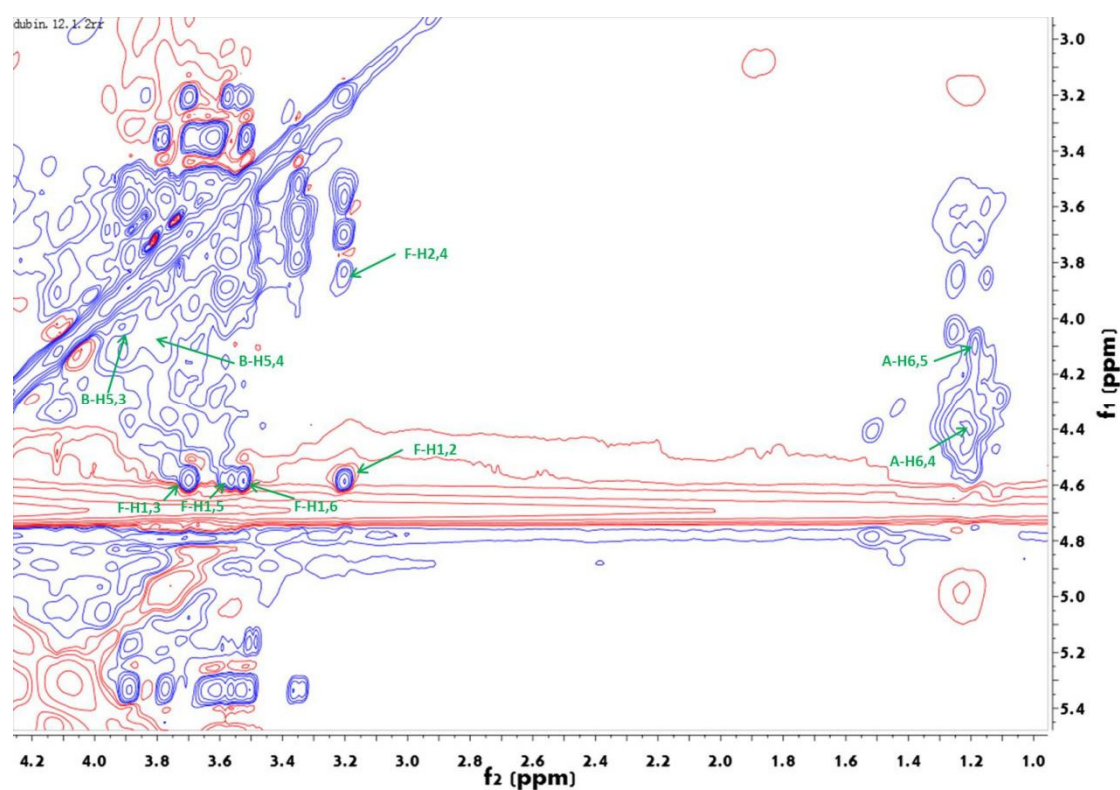

**Fig S4** Enlarged  $^1\text{H}$ - $^1\text{H}$  TOCSY of Fuc-S.



## 1.5 Fig S5

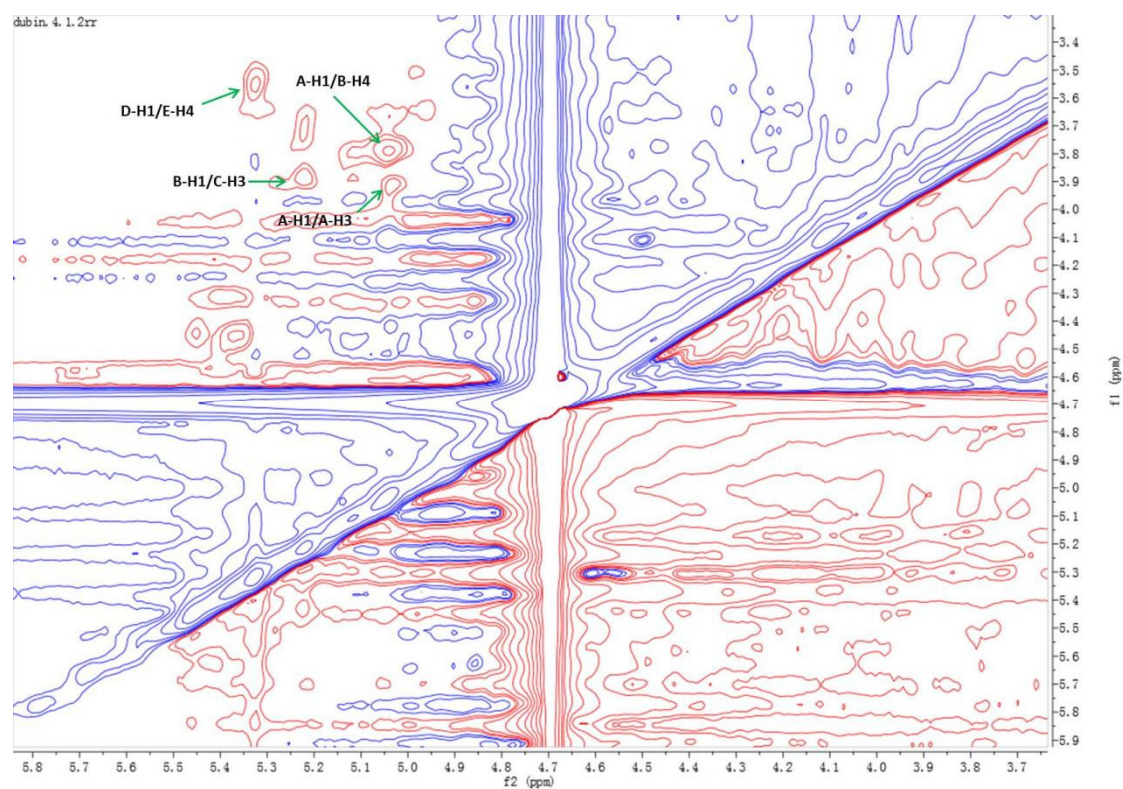

**Fig S5** Enlarged  $^1\text{H}$ - $^1\text{H}$  ROESY of Fuc-S.

1.6 Fig S6

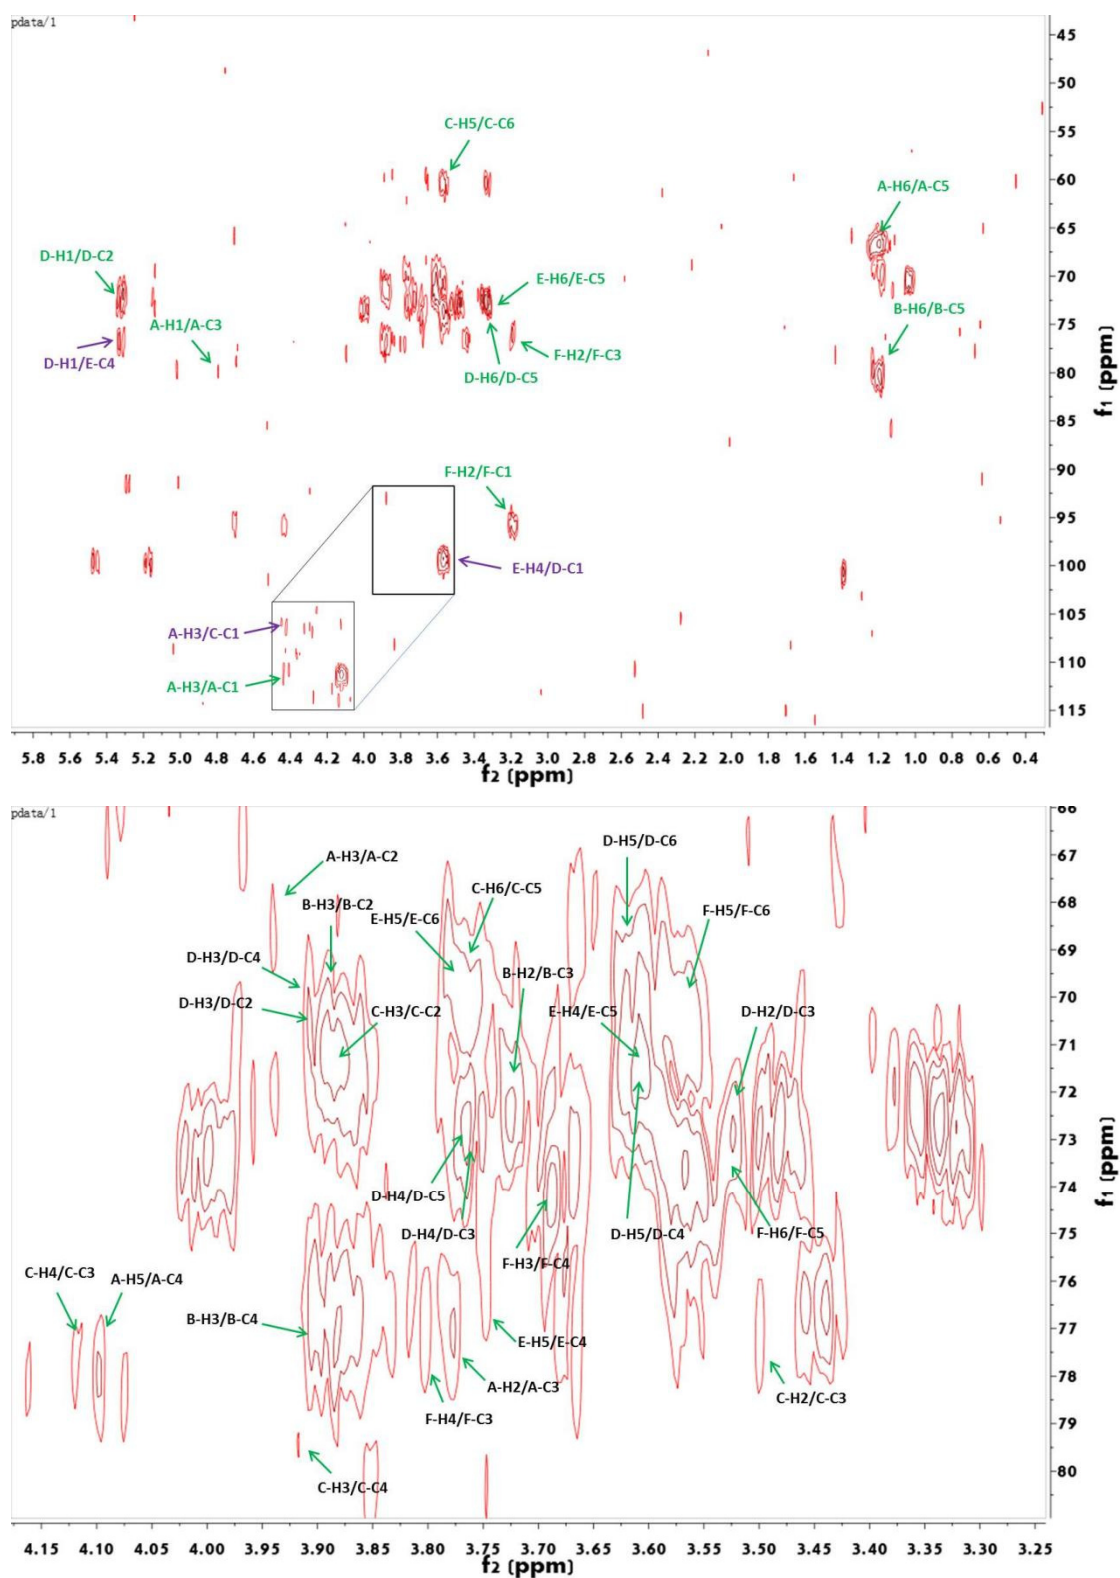

Fig S6 Enlarged  $^1\text{H}$ - $^1\text{H}$  ROESY of Fuc-S.



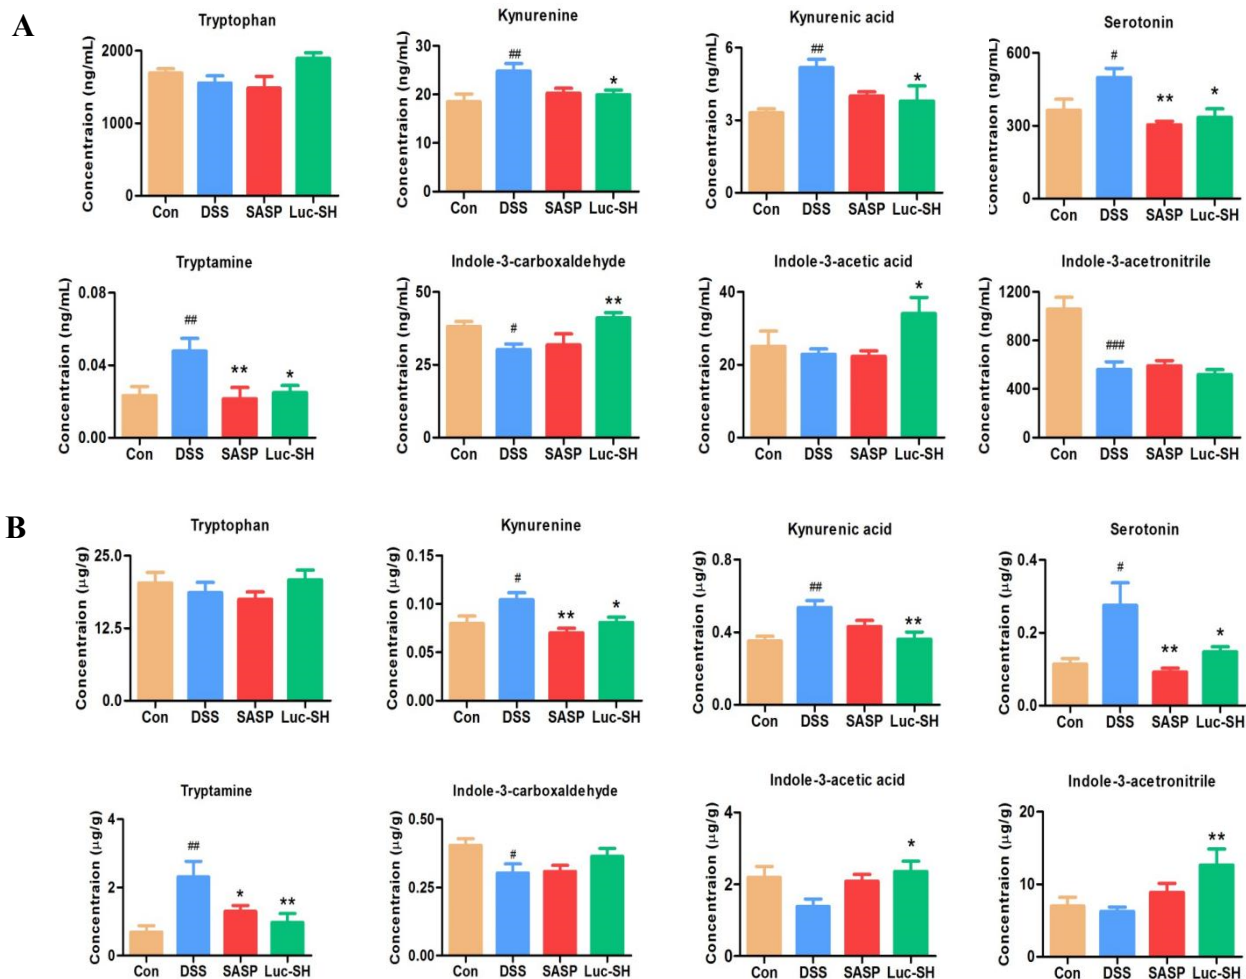

**Fig S7** Fuc-S modulated host-microbe tryptophan metabolism of DSS-induced chronic colitis in mice. (A) The changes of tryptophan, kynurenine, kynurenic acid, serotonin, tryptamine, indole-3-acetic acid, indole-3-acetonitrile and indole-3-carboxaldehyde in the serum. (B) The changes of tryptophan, kynurenine, kynurenic acid, serotonin, tryptamine, indole-3-acetic acid, indole-3-acetonitrile and indole-3-carboxaldehyde in the feces. Results are expressed as mean  $\pm$  SEM. (n=7-9) and analyzed using ANOVA followed by Duncan's multiple range tests. <sup>#</sup> $p < 0.05$ , <sup>##</sup> $p < 0.01$  and <sup>###</sup> $p < 0.001$ , compared to Con group; <sup>\*</sup> $p < 0.05$ , <sup>\*\*</sup> $p < 0.01$  and <sup>\*\*\*</sup> $p < 0.001$ , compared to DSS group. Con: control, SASP: salazosulfadimidine, Fuc-SH: Fuc-S with high dosage (200 mg/Kg).

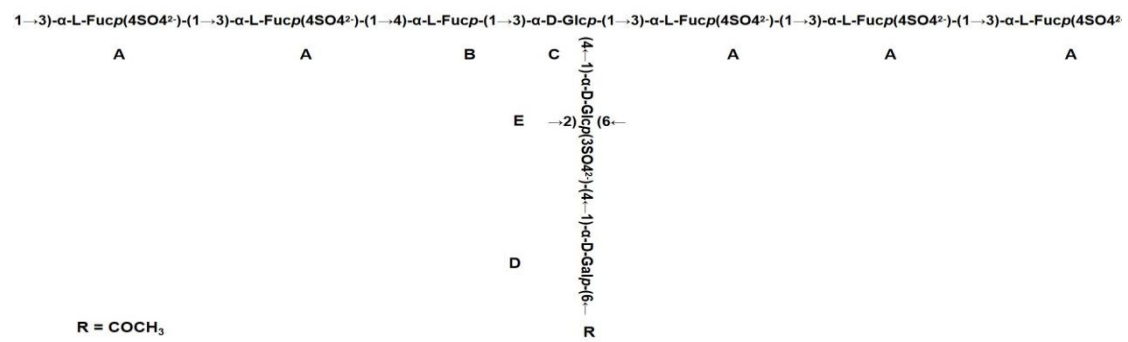

**Fig S8** Predicted structure of Fuc-S.

## 2. Supplementary Table

**Supplementary Table S1.** The MRM transition for quantification tryptophan metabolites.

| Compound Name           | Prec Ion | Prod Ion | Frag (V) | CE (V) | Polarity |
|-------------------------|----------|----------|----------|--------|----------|
| L-Kynurenine            | 209.1    | 192.1    | 50       | 5      | Positive |
| L-Kynurenine            | 209.1    | 94       | 50       | 9      | Positive |
| L-Tryptophan            | 205.1    | 188      | 90       | 5      | Positive |
| L-Tryptophan            | 205.1    | 118      | 90       | 29     | Positive |
| Kynurenic acid          | 190      | 144      | 110      | 17     | Positive |
| Kynurenic acid          | 190      | 89       | 110      | 45     | Positive |
| Serotonin               | 177.1    | 160      | 90       | 9      | Positive |
| Serotonin               | 177.1    | 115      | 90       | 29     | Positive |
| 3-Indole-acetic acid    | 176.1    | 130      | 110      | 13     | Positive |
| 3-Indole-acetic acid    | 176.1    | 77       | 110      | 41     | Positive |
| Tryptamine              | 161.1    | 144      | 50       | 9      | Positive |
| Tryptamine              | 161.1    | 115.1    | 50       | 37     | Positive |
| Indole-3-carboxaldehyde | 146.1    | 118.1    | 110      | 13     | Positive |
| Indole-3-carboxaldehyde | 146.1    | 91.1     | 110      | 33     | Positive |
